# Supplementary material
Source: ML conference proceedings conference paper supplement (https://proceedings.mlr.press/v84/gardner18a.html)
Supplement: Supplementary file 1 [file gardner18a-supp.pdf]

## Supplementary Materials for: Product Kernel Interpolation for Scalable Gaussian Processes

Jacob R. Gardner<sup>1</sup>, Geoff Pleiss<sup>1</sup>, Ruihan Wu<sup>1,2</sup>, Kilian Q. Weinberger<sup>1</sup>, Andrew Gordon Wilson<sup>1</sup>  
<sup>1</sup>Cornell University, <sup>2</sup>Tsinghua University

### S1 Proof of Lemma 3.1

Letting  $\mathbf{q}_i^{(1)}$  denote the  $i^{\text{th}}$  row of  $Q^{(1)}$  and  $\mathbf{q}_i^{(2)}$  denote the  $i^{\text{th}}$  row of  $Q^{(2)}$ , we can express the  $i^{\text{th}}$  entry  $K\mathbf{v}$ ,  $[K\mathbf{v}]_i$  as:

$$[K\mathbf{v}]_i = \mathbf{q}_i^{(1)T} T^{(1)} Q^{(1)\top} D_{\mathbf{v}} Q^{(2)} T^{(2)} \mathbf{q}_i^{(2)\top}$$

To evaluate this for all  $i$ , we first once compute the  $k \times k$  matrix:

$$M^{(1,2)} = T^{(1)} Q^{(1)\top} D_{\mathbf{v}} Q^{(2)} T^{(2)}.$$

This can be done in  $\mathcal{O}(nk^2)$  time.  $T^{(1)} Q^{(1)\top}$  and  $Q^{(2)} T^{(2)}$  can each be computed in  $\mathcal{O}(nk^2)$  time, as the  $Q$  matrices are  $n \times k$  and the  $T$  matrices are  $n \times k$ . Multiplying one of the results by  $D_{\mathbf{v}}$  takes  $\mathcal{O}(nk)$  time as it is diagonal. Finally, multiplying the two resulting  $n \times k$  matrices together takes  $\mathcal{O}(nk^2)$  time.

After computing  $M^{(1,2)}$ , we can compute each element of the matrix-vector multiply as:

$$[K\mathbf{v}]_i = \mathbf{q}_i^{(1)T} M^{(1,2)} \mathbf{q}_i^{(2)\top}.$$

Because  $M^{(1,2)}$  is  $k \times k$ , each of these takes  $\mathcal{O}(k)$  time to compute. Since there are  $n$  entries to evaluate in the MVM  $K\mathbf{v}$  in total, the total time requirement after computing  $M^{(1,2)}$  is  $\mathcal{O}(kn)$  time. Thus, given low rank structure, we can compute  $K\mathbf{v}$  in  $\mathcal{O}(k^2n)$  time total.

### S2 Proof of Theorem 3.3

Given the Lanczos decompositions of  $\tilde{K}^{(1)} = K_{XX}^{(1)} \circ \dots \circ K_{XX}^{(a)}$  and  $\tilde{K}^{(2)} = K_{XX}^{(a+1)} \circ \dots \circ K_{XX}^{(d)}$ , we can compute matrix-vector multiplies with  $\tilde{K}^{(1)} \circ \tilde{K}^{(2)}$  in  $\mathcal{O}(k^2n)$  time each. This lets us compute the Lanczos decomposition of  $\tilde{K}^{(1)} \circ \tilde{K}^{(2)}$  in  $\mathcal{O}(k^3n)$  time.

For clarity, suppose first that  $d = 3$ , i.e.,  $K = K_{XX}^{(1)} \circ K_{XX}^{(2)} \circ K_{XX}^{(3)}$ . We first Lanczos decompose  $K_{XX}^{(1)}$ ,  $K_{XX}^{(2)}$  and  $K_{XX}^{(3)}$ . Assuming for simplicity that MVMs with each matrix take the same amount of time, This takes

$\mathcal{O}(k\mu(K_{XX}^{(i)}))$  time total. We then use these Lanczos decompositions to compute matrix-vector multiplies with  $\tilde{K}_{XX}^{(1)}$  in  $\mathcal{O}(k^2n)$  time each. This allows us to Lanczos decompose it in  $\mathcal{O}(k^3n)$  time total. We can then compute matrix-vector multiplications  $K\mathbf{v}$  in  $\mathcal{O}(k^2n)$  time.

In the most general setting where  $K = K_{XX}^{(1)} \circ \dots \circ K_{XX}^{(d)}$ , we first Lanczos decompose the  $d$  component matrices in  $\mathcal{O}(dk\mu(K^{(i)}))$  and then perform  $\mathcal{O}(\log d)$  merges as described above, each of which takes  $\mathcal{O}(k^3n)$  time. After computing all necessary Lanczos decompositions, matrix-vector multiplications with  $K$  can be performed in  $\mathcal{O}(k^2n)$  time.

As a result, a single matrix-vector multiply with  $K$  takes  $\mathcal{O}(dk\mu(K^{(i)}) + k^3n \log d + k^2n)$  time. With the Lanczos decompositions precomputed, multiple MVMs in a row can be performed significantly faster. For example, running  $p$  iterations of conjugate gradients with  $K$  takes  $\mathcal{O}(dk\mu(K^{(i)}) + k^3n \log d + pk^2n)$  time.
